# Supplementary material for: Systematic review of outcome domains and instruments used in designs of clinical trials for interventions that seek to restore bilateral and binaural hearing in adults with unilateral severe to profound sensorineural hearing loss (‘single-sided deafness’)
Source: PubMed Central journal article supplement (PMC7981927; doi:10.1186/s13063-021-05160-5), 2021-03-20
Supplement: 13063_2021_5160_MOESM2_ESM.pdf [file 13063_2021_5160_MOESM2_ESM.pdf]

**Towards a Consensus on Outcome Measures for Interventions that Seek to Restore Bilateral and Binaural Hearing in Adults with Unilateral Severe-to-Profound Hearing Loss: The CROSSSD (Core Rehabilitation Outcome Set for Single Sided Deafness) Study**

Search Syntax for Excerpta Medica dataBASE (EMBASE) and Medical Literature Analysis and Retrieval System Online (MEDLINE) via OvidSP:

| Term Type                      | Search Term                           | Field Restrictions |
|--------------------------------|---------------------------------------|--------------------|
| <b>Condition &amp; Causes:</b> |                                       |                    |
| 1. MeSH                        | unilateral hearing loss               |                    |
| 2. MeSH                        | acoustic neuroma                      |                    |
| 3. MeSH                        | sudden hearing loss                   |                    |
| 4. MeSH                        | meniere disease                       |                    |
| 5. Text                        | unilateral adj3 hearing loss          | title, abstract    |
| 6. Text                        | unilateral adj3 deafness              | title, abstract    |
| 7. Text                        | single sided adj3 deafness            | title, abstract    |
| 8. Text                        | asymmetric adj3 hearing               | title, abstract    |
| 9. Boolean                     | 1 OR 2 OR 3 OR 4 OR 5 OR 6 OR 7 OR 8  |                    |
| <b>Interventions:</b>          |                                       |                    |
| 10. MeSH                       | bone conduction hearing aid           |                    |
| 11. MeSH                       | bone conduction                       |                    |
| 12. MeSH                       | middle ear implant                    |                    |
| 13. MeSH                       | cochlear implant                      |                    |
| 14. Text                       | bone anchored adj2 implant*           | title, abstract    |
| 15. Text                       | bone anchored adj2 aid*               | title, abstract    |
| 16. Text                       | bone conduction adj2 device*          | title, abstract    |
| 17. Text                       | BAHA*                                 | title, abstract    |
| 18. Text                       | BCD*                                  | title, abstract    |
| 19. Text                       | contralateral routing adj2 sound*     | title, abstract    |
| 20. Text                       | contralateral routing adj2 signal*    | title, abstract    |
| 21. Text                       | contralateral rerouting adj2 sound*   | title, abstract    |
| 22. Text                       | contralateral rerouting adj2 signal*  | title, abstract    |
| 23. Text                       | contralateral re-routing adj2 sound*  | title, abstract    |
| 24. Text                       | contralateral re-routing adj2 signal* | title, abstract    |
| 25. Text                       | CROS                                  | title, abstract    |
| 26. Text                       | BiCROS                                | title, abstract    |
| 27. Text                       | middle ear implant*                   | title, abstract    |
| 28. Text                       | MEI                                   | title, abstract    |
| 29. Text                       | auditory implant*                     | title, abstract    |
| 30. Text                       | cochlear implant*                     | title, abstract    |
| 31. Text                       | transcranial                          | title, abstract    |

|     |         |                                                                                                                                                                |                 |
|-----|---------|----------------------------------------------------------------------------------------------------------------------------------------------------------------|-----------------|
| 32. | Text    | percutaneous adj2 device                                                                                                                                       | title, abstract |
| 33. | Text    | percutaneous adj2 implant                                                                                                                                      | title, abstract |
| 34. | Text    | subcutaneous adj2 device                                                                                                                                       | title, abstract |
| 35. | Text    | subcutaneous adj2 implant                                                                                                                                      | title, abstract |
| 36. | Boolean | 10 OR 11 OR 12 OR 13 OR 14 OR 15 OR 16 OR 17 OR 18 OR 19<br>OR 20 OR 21 OR 22 OR 23 OR 24 OR 25 OR 26 OR 27 OR 28 OR<br>29 OR 30 OR 31 OR 32 OR 33 OR 34 OR 35 |                 |

**Composition:**

|     |         |          |  |
|-----|---------|----------|--|
| 37. | Boolean | 9 AND 36 |  |
|-----|---------|----------|--|

**Commands specific to OvidSP interface:**

\* = truncated match

MeSH = Medical Subject Headings

Boolean = Operators used to retrieve search terms

adj2 = Adjacency / Proximity, words have to appear within 2 words of each other
