# Supplementary material for: Systematic review of outcome domains and instruments used in designs of clinical trials for interventions that seek to restore bilateral and binaural hearing in adults with unilateral severe to profound sensorineural hearing loss (‘single-sided deafness’)
Source: PubMed Central journal article supplement (PMC7981927; doi:10.1186/s13063-021-05160-5), 2021-03-20
Supplement: 13063_2021_5160_MOESM8_ESM.pdf [file 13063_2021_5160_MOESM8_ESM.pdf]

**Towards a Consensus on Outcome Measures for Interventions that Seek to Restore Bilateral and Binaural Hearing in Adults with Unilateral Severe-to-Profound Hearing Loss: The CROSSSD (Core Rehabilitation Outcome Set for Single Sided Deafness) Study**

Table of records containing missing data that was queried to the corresponding author by email, and outcome:

| Reference for the study record                                                                                                                                                                                                                                                                                                                                                            | Query                                                                      | Outcome                                                              | Decision                                                                 |
|-------------------------------------------------------------------------------------------------------------------------------------------------------------------------------------------------------------------------------------------------------------------------------------------------------------------------------------------------------------------------------------------|----------------------------------------------------------------------------|----------------------------------------------------------------------|--------------------------------------------------------------------------|
| Buechner, A., Brendel, M., Lesinski-Schiedat, A., Wenzel, G., Frohne-Buechner, C., Jaeger, B., & Lenarz, T. (2010). Cochlear implantation in unilateral deaf subjects associated with ipsilateral tinnitus. <i>Otol Neurotol.</i> <b>31</b> (9): 1381–1385.                                                                                                                               | Exact audiometric thresholds                                               | No response                                                          | Included for sensitivity analysis                                        |
| Cabral Junior, F., Hausen Pinna, M., Dourado Alves, R., dos Santos Malerbi, A.F., & Ferreira Bento, R. (2016). Cochlear implantation and single-sided deafness: A systematic review of the literature. <i>Int Arch Otorhinolaryngol.</i> <b>20</b> (1): 69–75.                                                                                                                            | SSD definition not explicitly defined                                      | No response                                                          | Included for sensitivity analysis                                        |
| Brendel, M., & Hamacher, V. (2018). Influence of Contralateral Routing of Signals (CROS) on hearing abilities of different groups of cochlear implant user. In: drks.de. <a href="http://www.drks.de/DRKS00013973">http://www.drks.de/DRKS00013973</a> . Accessed 16 May 2020.                                                                                                            | Unsure if inclusion criteria allow SSD participant recruitment             | Response from authors: No SSD participants included                  | Excluded from data extraction                                            |
| Syms, C. (2013). Evaluation of benefit for treatment of Single Sided Deafness (SSD) between two bone conduction prosthetic devices; osseointegrated implant versus maxilla anchored removable oral appliance (“SoundBite”). In: ClinicalTrials.gov. <a href="https://clinicaltrials.gov/ct2/show/NCT01933386">https://clinicaltrials.gov/ct2/show/NCT01933386</a> . Accessed 16 May 2020. | SSD not explicitly defined                                                 | Email to authors undeliverable                                       | Included for data extraction as intention is to recruit SSD participants |
| Smith, M.D., & Knappett, R. (2015). Hearing handicap in patients with single sided deafness. In: ClinicalTrials.gov. <a href="https://clinicaltrials.gov/ct2/show/NCT02525640">https://clinicaltrials.gov/ct2/show/NCT02525640</a> . Accessed 16 May 2020.                                                                                                                                | SSD criteria not explicitly defined                                        | Response from authors: Some participants had asymmetric hearing loss | Included for sensitivity analysis                                        |
| Gnansia, D., & Frachet, B. (2016). Tinnitus treatment with cochlear implant in single sided deafness. In: ClinicalTrials.gov. <a href="https://clinicaltrials.gov/ct2/show/NCT02966366">https://clinicaltrials.gov/ct2/show/NCT02966366</a> . Accessed 16 May 2020.                                                                                                                       | Audiometric criteria for ‘normal or near normal’ ear not explicitly stated | Response from authors: ‘no exact criteria set for normal ear’        | Included for sensitivity analysis                                        |

|                                                                                                                                                                                                                                                                                                                                        |                                                                                                                                                       |                                                                                    |                                   |
|----------------------------------------------------------------------------------------------------------------------------------------------------------------------------------------------------------------------------------------------------------------------------------------------------------------------------------------|-------------------------------------------------------------------------------------------------------------------------------------------------------|------------------------------------------------------------------------------------|-----------------------------------|
| Willeboer, K. (2005). Parametric cochlear implant map adjustment by implant recipients. In: trialregister.nl. <a href="https://www.trialregister.nl/trial/452">https://www.trialregister.nl/trial/452</a> . Accessed 16 May 2020.                                                                                                      | Audiometric criteria not listed                                                                                                                       | Response from authors: Study include participants with bilateral hearing loss      | Excluded from data extraction     |
| Dillon, M.T., Buss, E., Anderson, M.L., King, E.R., Deres, E.J., Buchman, C.A., Brown, K.D., & Pillsbury, H.C. (2017). Cochlear implantation in cases of unilateral hearing loss: Initial localization abilities. <i>Ear Hear.</i> <b>38</b> : 611–619.                                                                                | Audiometric thresholds listed for up to 2kHz, no information on 4kHz                                                                                  | No response                                                                        | Included for sensitivity analysis |
| Dillon, M.T., Buss, E., Rooth, M.A., King, E.R., Deres, E.J., Buchman, C.A., Pillsbury, H.C., & Brown, K.D. (2018). Effect of cochlear implantation on quality of life in adults with unilateral hearing loss. <i>Audiol Neurotol.</i> <b>22</b> (4–5): 259–271.                                                                       | Not all participants meet SSD definition                                                                                                              | No response                                                                        | Included for sensitivity analysis |
| Doobe, G., Ernst, A., Ramalingam, R., Mittmann, P., & Todt, I. (2015). Simultaneous labyrinthectomy and cochlear implantation for patients with single-sided Ménière’s Disease and profound sensorineural hearing loss. <i>Biomed Res Int.</i> <a href="https://doi.org/10.1155/2015/457318">https://doi.org/10.1155/2015/457318</a> . | Hearing thresholds for non-Ménière’s disease ear not explicitly listed                                                                                | First author responded; team were to follow up, no subsequent response             | Included for sensitivity analysis |
| Dumon, T., Medina, M., & Sperling, N.M. (2016). Punch and Drill: Implantation of bone anchored hearing device through a minimal skin punch incision versus implantation with dermatome and soft tissue reduction. <i>Ann Otol Rhinol Laryngol.</i> <b>125</b> : 199–206.                                                               | Insufficient details given to check if participants met PICO. Just states "...candidacy based on clinical parameters" without stating what these were | Response from authors: Still unclear, asked for further clarification, no response | Excluded from data extraction     |
| Hill, S.L. 3rd, Marcus, A., Digges, E.N.B., Gillman, N., & Silverstein, H. (2006). Assessment of patient satisfaction with various configurations of digital CROS and BiCROS hearing aids. <i>Ear Nose Throat J.</i> <b>85</b> (7): 427–430.                                                                                           | Exact audiometric thresholds for ‘asymmetric hearing loss’ not stated                                                                                 | Email to authors undeliverable                                                     | Excluded from data extraction     |
| Hol, M.K.S., Kunst, S.J.W., Snik, A.F.M., & Cremers, C.W.R.J. (2010). Pilot study on the effectiveness of the conventional CROS, the transcranial CROS and the BAHA transcranial CROS in adults with unilateral inner ear deafness. <i>Eur Arch Otorhinolaryngol.</i> <b>267</b> (6): 889–896.                                         | Audiometric thresholds of poor ear not explicitly listed                                                                                              | No response                                                                        | Included for sensitivity analysis |
| Kubo, T., Yamamoto, K.I., Iwaki, T., Doi, K., & Tamura, M. (2001). Different forms of dizziness occurring after cochlear implant. <i>Eur Arch Oto-Rhino-Laryngology.</i> <b>258</b> (1): 9–12.                                                                                                                                         | Audiometric criteria not listed                                                                                                                       | Email to authors undeliverable                                                     | Excluded from data extraction     |
| Louza, J., Hempel, J.M., Krause, E., Berghaus, A., Müller, J., & Braun, T. (2017). Patient benefit from cochlear implantation in                                                                                                                                                                                                       | Audiometric thresholds for poor ear not explicitly listed                                                                                             | No response                                                                        | Included for sensitivity analysis |

|                                                                                                                                                                                                                                                                                                                    |                                                                    |                                                                                      |                                            |
|--------------------------------------------------------------------------------------------------------------------------------------------------------------------------------------------------------------------------------------------------------------------------------------------------------------------|--------------------------------------------------------------------|--------------------------------------------------------------------------------------|--------------------------------------------|
| single-sided deafness: a 1-year follow-up. <i>Eur Arch Oto-Rhino-Laryngology</i> . <b>274</b> (6): 2405–2409.                                                                                                                                                                                                      |                                                                    |                                                                                      |                                            |
| Sladen, D.P., Carlson, M.L., Dowling, B.P., Olund, A.P., Teece, K., DeJong, M.D., Breneman, A., Peterson, A., Beatty, C.W., Neff, B.A., & Driscoll, C.L. (2017). Early outcomes after cochlear implantation for adults and children with unilateral hearing loss. <i>Laryngoscope</i> . <b>127</b> (7): 1683–1688. | Audiometric criteria for ‘unilaterally deaf’ not explicitly stated | Response from authors: A few participants do not fit the SSD definition in worse ear | Included for sensitivity analysis          |
| Song, J.-J., Punte, A.K., De Ridder, D., Vanneste, S., & Van de Heyning, P. (2013). Neural substrates predicting improvement of tinnitus after cochlear implantation in patients with single-sided deafness. <i>Hear Res</i> . <b>299</b> : 1–9.                                                                   | SSD criteria not explicitly defined                                | Response from authors: All participants fit SSD definition                           | Included for data extraction and synthesis |
